# Supplementary material for: Defect Engineering Enhances the Charge Separation of CeO2 Nanorods toward Photocatalytic Methyl Blue Oxidation
Source: PubMed Central journal article supplement (PMC7700514; doi:10.3390/nano10112307), 2020-11-21
Supplement: nanomaterials-10-02307-s001.pdf [file nanomaterials-10-02307-s001.pdf]

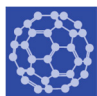

## Supplementary Materials

# Defect Engineering Enhances the Charge Separation of CeO<sub>2</sub> Nanorods toward Photocatalytic Methyl Blue Oxidation

Jindong Yang <sup>1</sup>, Ning Xie <sup>2</sup>, Jingnan Zhang <sup>1</sup>, Wenjie Fan <sup>3</sup>, Yongchao Huang <sup>2,\*</sup> and Yexiang Tong <sup>1,\*</sup>

<sup>1</sup> MOE Laboratory of Bioinorganic and Synthetic Chemistry the Key Lab of Low-Carbon Chemistry and Energy Conservation of Guangdong Province, School of Chemistry, Sun Yat-sen University, Guangzhou 510006, China; usayjd@hotmail.com (J.Y.); zhangjn28@mail2.sysu.edu.cn (J.Z.)

<sup>2</sup> Institute of Environmental Research at Greater Bay Area, Key Laboratory for Water Quality and Conservation of the Pearl River Delta, Ministry of Education; Guangzhou Key Laboratory for Clean Energy and Materials, Guangzhou University, Guangzhou 510006, China; xiening0101@163.com

<sup>3</sup> Analysis and Testing Center, South China Normal University, Guangzhou 510006, China; 20175033@m.scnu.edu.cn

\* Correspondence: huangych@gzhu.edu.cn (Y.H.), chedhx@mail.sysu.edu.cn (Y.T.)

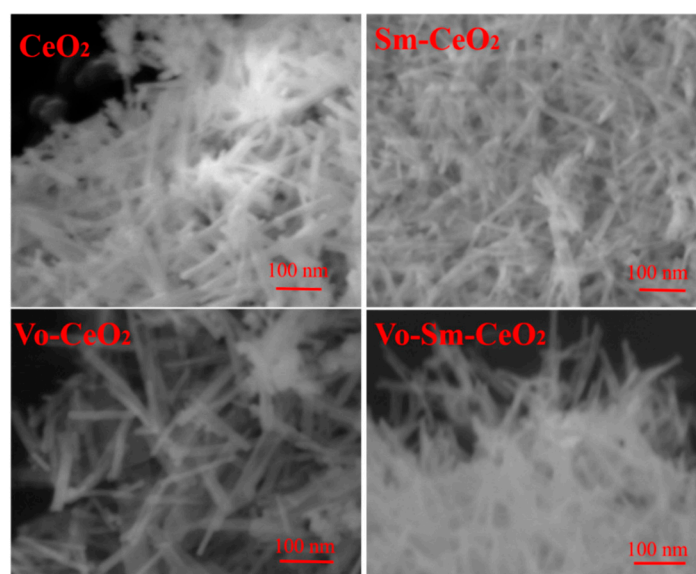

**Figure S1.** SEM images of CeO<sub>2</sub>, Sm-CeO<sub>2</sub>, Vo-CeO<sub>2</sub> and Vo-Sm-CeO<sub>2</sub>.

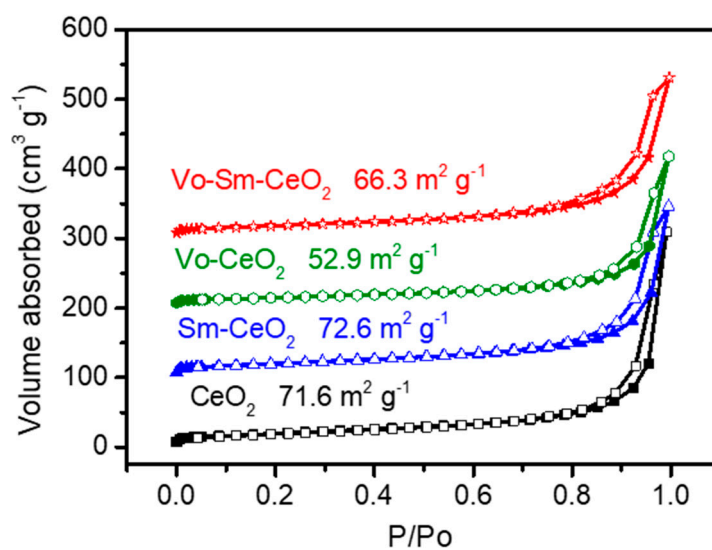

Figure S2. The N<sub>2</sub> adsorption spectra of all the samples.

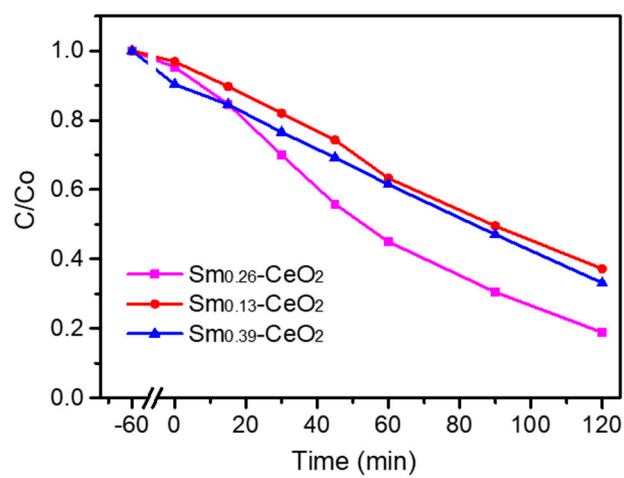

Figure S3. Photocatalytic performance of Sm doping CeO<sub>2</sub>.

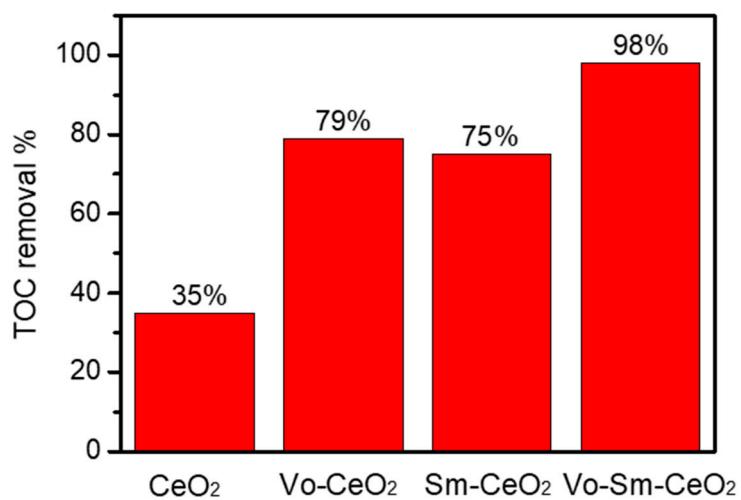

**Figure S4.** TOC removal efficiency CeO<sub>2</sub>, Sm-CeO<sub>2</sub>, Vo-CeO<sub>2</sub> and Vo-Sm-CeO<sub>2</sub> at 120 min.

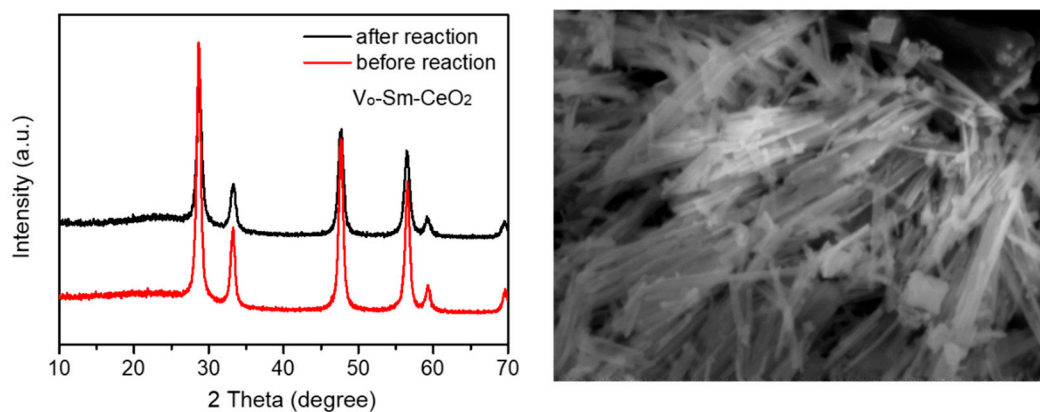

**Figure S5.** XRD spectra and SEM image of Vo-Sm-CeO<sub>2</sub> after five cycles test.

**Table S1.** The performance of Vo-Sm-CeO<sub>2</sub> is also compared with other reported Ce based photocatalysts.

| Samples                                                                      | Solution                                  | Light Source                                             | Photocatalytic Efficiency                             | Ref.          |
|------------------------------------------------------------------------------|-------------------------------------------|----------------------------------------------------------|-------------------------------------------------------|---------------|
| Vo-Sm-CeO <sub>2</sub><br>(0.02 g)                                           | 100 mL MB<br>(10 mg/L)                    | 300 W Xe lamp coupled<br>with a<br>420 nm cut-off filter | *T <sub>50</sub> =30 min<br>*T <sub>100</sub> =90 min | Our<br>sample |
| Ce <sub>x</sub> Co <sub>1-x</sub> O <sub>2</sub><br>nanoparticle<br>(0.01 g) | 200 mL MB<br>(10 ppm)                     | 150 W Xenon lamp                                         | T <sub>29</sub> = 180 min                             | 1             |
| ZnO/CeO <sub>2</sub> /10<br>wt.% NGP<br>(0.03 g)                             | 100 mL MB<br>(20 mg/L)                    | 150 W Xenon lamp                                         | T <sub>84</sub> =120 min                              | 2             |
| CeCa <sub>5</sub><br>quantum dots<br>(0.2 g)                                 | 100 mL MB<br>(5 × 10 <sup>-3</sup> M)     | 150 W Xenon lamp                                         | T <sub>84</sub> =50 min                               | 3             |
| CeO <sub>2</sub> Nps<br>(0.1g)                                               | 100 mL MB<br>(10 ppm)                     | 125 W UV-light                                           | T <sub>94</sub> =180 min                              | 4             |
| AgNWs@Ce<br>O <sub>2</sub> -2<br>(0.05g)                                     | 100 mL MB<br>(10 ppm)                     | 300 W Xe lamp                                            | T <sub>80</sub> =150 min                              | 5             |
| ZnO/CeO <sub>2</sub><br>(90:10) (0.5g)                                       | 500 mL MB                                 | 250 W projection lamp                                    | T <sub>97</sub> =150 min                              | 6             |
| CeO <sub>2</sub> /Tb <sub>2</sub> O <sub>3</sub><br>nanotubes<br>(0.01g)     | 15 mL MB<br>(0.3 mM)                      | 50W Xenon lamp                                           | T <sub>93</sub> =75 min                               | 7             |
| 5 wt% Zn-<br>CeO <sub>2</sub><br>(0.5g)                                      | 500 mL MB<br>(3 × 10 <sup>-5</sup> mol/L) | 400 W sodium lamp                                        | T <sub>85</sub> =180 min                              | 8             |
| CeO <sub>2</sub> /g-C <sub>3</sub> N <sub>4</sub><br>(13.0%)<br>(0.1g)       | 100 mL MB<br>(10 mg/L)                    | 300 W Xe lamp with a<br>400 nm cutoff filter             | T <sub>95</sub> =120 min                              | 9             |
| RGO/CeO <sub>2</sub><br>(0.015g)                                             | 100 mL MB<br>(1 × 10 <sup>-5</sup> M)     | direct sunlight                                          | T <sub>50</sub> =90 min                               | 10            |
| CeO <sub>2</sub><br>nanoparticles<br>(0.05g)                                 | 100 mL MB<br>(12ppm)                      | 20 W UV light                                            | T <sub>94</sub> =27 min                               | 11            |
| Gd-CeO <sub>2</sub><br>nanoparticles<br>(0.1g)                               | 100 mL MB<br>(1.7 × 10 <sup>-6</sup> M)   | 900W UV-light source                                     | T <sub>98</sub> =300min                               | 12            |

\*T<sub>50</sub> means the time needs for photocatalytic degradation of 50% MB.

## Reference

- George S E, George M, Alex J, et al. Nonlinear optical and photocatalytic dye degradation of Co doped CeO<sub>2</sub> nanostructures synthesized through a modified combustion technique. *Ceramics International*, 2020.
- Tju H, Shabrany H, Taufik A, et al. Degradation of methylene blue (MB) using ZnO/CeO<sub>2</sub>/nanographene platelets (NGP) photocatalyst: Effect of various concentration of NGP[C]//AIP Conference Proceedings. AIP Publishing LLC, 2017, 1862(1): 030037.
- Ramasamy V, Mohana V, Rajendran V. Characterization of Ca doped CeO<sub>2</sub> quantum dots and their applications in photocatalytic degradation. *OpenNano*, 2018, 3: 38-47.
- Yadav L S R, Lingaraju K, Prasad B D, et al. Synthesis of CeO<sub>2</sub> nanoparticles: photocatalytic and antibacterial activities. *The European Physical Journal Plus*, 2017, 132(5): 239.
- Wu L, Fang S, Ge L, et al. Facile synthesis of Ag@ CeO<sub>2</sub> core-shell plasmonic photocatalysts with enhanced visible-light photocatalytic performance. *Journal of Hazardous Materials*, 2015, 300: 93-103.

6. Rajendran S, Khan M M, Gracia F, et al. Ce<sup>3+</sup>-ion-induced visible-light photocatalytic degradation and electrochemical activity of ZnO/CeO<sub>2</sub> nanocomposite. *Scientific Reports*, 2016, 6: 31641.
7. Arul N S, Mangalaraj D, Kim T W. Photocatalytic degradation mechanisms of CeO<sub>2</sub>/Tb<sub>2</sub>O<sub>3</sub> nanotubes. *Applied Surface Science*, 2015, 349: 459-464.
8. Khan M A M, Khan W, Ahamed M, et al. Microstructural properties and enhanced photocatalytic performance of Zn doped CeO<sub>2</sub> nanocrystals. *Scientific reports*, 2017, 7(1): 1-11.
9. Huang L, Li Y, Xu H, et al. Synthesis and characterization of CeO<sub>2</sub>/g-C<sub>3</sub>N<sub>4</sub> composites with enhanced visible-light photocatalytic activity. *Rsc Advances*, 2013, 3(44): 22269-22279.
10. Kaur J, Anand K, Anand K, et al. Reduced graphene oxide/CeO<sub>2</sub> nanocomposite with enhanced photocatalytic performance[C]//AIP Conference Proceedings. AIP Publishing LLC, 2015, 1661(1): 080009.
11. Tuyen L T T, Quang Khieu D, Long H T, et al. Monodisperse uniform CeO<sub>2</sub> nanoparticles: Controlled synthesis and photocatalytic property. *Journal of Nanomaterials*, 2016, 2016.
12. El Rouby W M A, Farghali A A, Hamdedein A. Microwave synthesis of pure and doped cerium (IV) oxide (CeO<sub>2</sub>) nanoparticles for methylene blue degradation. *Water Science and Technology*, 2016, 74(10): 2325-2336.

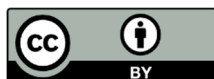

© 2020 by the authors. Submitted for possible open access publication under the terms and conditions of the Creative Commons Attribution (CC BY) license (<http://creativecommons.org/licenses/by/4.0/>).
